# Supplementary material
Source: PubMed Central journal article supplement (PMC2230558)
Supplement: plntphys_pp.107.110353_1.pdf [file plntphys_pp.107.110353_1.pdf]

302994

AH014393.fasta

SOLO s0 BARE1 0 3 0 3

s0 210971 210983 1251 1299

PAIR p0 BAGY2 1 0.047 13 13 0

p0 L 91244 92351 3 1092

p0 R 99995 101086 1 1092 101087 101507 9851 10272

p0 M 92352 99995 1116 8759

PAIR p1 BARE1 0 0.005 30 13 1

p1 L 242456 243432 1 965

p1 R 249587 250563 1 965 250568 250674 1049 1154

p1 M 243443 245059 1056 2649 245068 245386 2651 2970 245472 249485 3039 7060

PAIR p2 Haight 1 0.028 30 12 1

p2 L 228783 229143 1 360

p2 R 241324 241684 1 360

p2 M 229147 229580 346 783 231110 232675 798 2353 232699 232807 9632 9746 232898

233204 2600 2905 233199 233744 3126 3671 234811 241307 5069 11550

PAIR p3 Jeli 1 0.021 34 34 0

p3 L 265749 265940 1 192

p3 R 287653 287844 1 192 287845 288211 198 539

p3 M 265941 266168 198 425 266171 277142 402 11417 287447 287653 11391 11597

PAIR p4 Lolaog 0 0.051 11 11 0

p4 L 57371 57505 6 141 57506 58448 1 943

p4 R 89289 90229 5 943

p4 M 58449 61022 1084 3657 69934 75168 3648 8882 80816 81017 8881 9082 85977

86541 9076 9640 89123 89289 9597 9763

PAIR p5 Sabrina 0 0.035 28 28 0

p5 L 219314 220727 1 1405

p5 R 225875 227291 1 1405

p5 M 220809 221020 1482 1689 221021 224042 1682 4688 224177 224783 4797 5405

225017 225411 5701 6096 225475 225860 6179 6563

PAIR p6 BARE1 1 0.024 11 0 1

p6 L 61709 61786 651 728 61797 62773 749 1713

p6 R 68903 69867 749 1713

p6 M 62873 66867 1783 5786 66878 67646 5788 6575 67656 68149 6586 7077 68156

68891 7083 7787

PAIR p7 BARE1 1 0.030 25 25 0

p7 L 160316 162079 1 1713

p7 R 182443 184185 1 1713

p7 M 162080 163628 1 1 179338 182442 1 1

PAIR p11 BARE1 1 0.022 25 25 0

p11 L 169109 170853 1 1713

p11 R 175917 177657 1 1713

p11 M 170854 175916 1 1

PAIR p12 BARE1 1 0.024 25 25 0

p12 L 163629 165365 1 1713

p12 R 177772 179337 1 1713

p12 M 165366 169108 1 1 177658 177771 1 1

PAIR p8 BARE1 1 0.014 34 16 1

p8 L 277145 277661 7083 7572 278347 279323 749 1713

p8 R 285240 286216 749 1713 286282 287446 608 1775

p8 M 279425 283420 1783 5786 283524 283842 5873 6192 283857 285010 6201 7366

PAIR p9 Sabrina 1 0.035 9 9 0

p9 L 50380 51857 1 1455

p9 R 56850 57370 1 517 90230 91243 513 1549

p9 M 51858 52762 1479 2387 52712 52892 2388 2567 52889 56850 2601 6532

PAIR p10 BARE1 0 0.024 27 3 2

p10 L 209643 210785 1 1145  
p10 R 217372 218572 1 1200  
p10 M 210984 217371 1334 7642  
FRAG f0 BAGY1 0 27 2 2  
f0 198694 202452 4204 8478  
FRAG f2 Jeli 0 0 0 0  
f2 2 8281 3491 12137  
FRAG f5 Maximus 0 23 23 0  
f5 159253 160053 1 809 160063 160305 12361 12614  
FRAG f6 Maximus 0 27 27 0  
f6 184917 185987 2638 3766 185989 193966 3767 12427 219077 219243 12414 12595  
FRAG f7 Maximus 0 29 29 0  
f7 227428 227787 1045 1405  
FRAG f10 BARE1 0 39 39 0  
f10 297974 302988 1 5275  
FRAG f11 Caspar 0 1 1 0  
f11 10313 10440 797 932 11221 11325 3105 3210  
FRAG f12 Caspar 0 2 2 0  
f12 12265 12569 675 986  
FRAG f13 Ikeros 0 38 38 0  
f13 295452 295772 51 370  
FRAG f14 Troy 0 32 32 0  
f14 262565 262671 151 265  
FRAG f15 Vagabond 0 27 9 1  
f15 194102 194318 1 219 194320 198692 220 3694 203778 208014 7504 11789  
FRAG f16 Xanti 0 18 18 0  
f16 128501 129269 1 716  
FRAG f17 XI 0 19 19 0  
f17 131201 131420 1 225  
FRAG f20 Usier 0 11 1 1  
f20 75169 80814 6209 11771  
NLTR n3 Damocles 0 3 3 0  
n3 12669 12826 1 159  
NLTR n4 Dido 0 15 15 0  
n4 105965 106219 1 256  
NLTR n5 Dido 0 16 16 0  
n5 118326 118579 1 256  
NLTR n6 HORGY 0 30 30 0  
n6 227815 228781 1 968 241830 242381 961 1513 251340 252917 1509 3087  
NLTR n7 HORPIA2 0 6 6 0  
n7 31710 33588 1 1880 33590 36003 1881 4295  
NLTR n8 Icarus 0 8 8 0  
n8 44188 44305 1 119  
NLTR n9 Kerberos 0 4 4 0  
n9 17749 18026 1 279  
NLTR n10 Kerberos 0 7 7 0  
n10 43888 44168 1 279  
NLTR n11 Kerberos 0 31 31 0  
n11 254166 254457 3 279  
NLTR n12 Morpheus 0 5 5 0  
n12 21890 25191 1 3303 25193 29866 3304 7978  
NLTR n13 Persephone 0 17 17 0  
n13 118581 120741 33 2194 120743 126466 2195 7919  
NLTR n14 Pluto 0 36 36 0  
n14 289737 290011 1 278  
NLTR n15 Sukkula 0 22 3 1  
n15 145276 150126 3 4971

NLTR n16 Tara 0 22 22 0  
n16 144889 145274 1 396 150227 150471 490 735  
NLTR n17 Troy 0 33 33 0  
n17 265129 265458 1 331  
NLTR n18 XI 0 20 20 0  
n18 132090 132442 15 368  
NLTR n19 Xian 0 21 21 0  
n19 143248 144348 1 1157  
NLTR n20 XIR 0 27 10 1  
n20 208020 209641 134 1756 218577 219075 1752 2254  
NLTR n21 Xumet 0 37 37 0  
n21 290099 290459 3 364  
NLTR n2 Sukkula 0 11 2 1  
n2 81018 85976 7 4966
