# Supplementary material
Source: PubMed Central journal article supplement (PMC2230558)
Supplement: plntphys_pp.107.110353_2.pdf [file plntphys_pp.107.110353_2.pdf]

185534  
AC145481.fasta  
SOLO s5 prem 0 3 2 3  
s5 58746 58794 361 413  
PAIR p0 diguus 1 0.005 18 18 0  
p0 L 130486 131823 1 1355  
p0 R 138821 140159 1 1355  
p0 M 131823 138821 1 1  
PAIR p1 grande 1 0.041 21 22 1  
p1 L 151157 151785 1 631  
p1 R 164794 165427 1 636  
p1 M 151786 154396 7456 9486 154403 155618 3014 4229 155621 155844 10667 12036  
155846 156807 3 924 156809 157064 29 871 157121 158946 6928 7512 158960 159429  
13538 13993 159430 164447 7788 12815 164449 164793 182 515  
PAIR p2 gyma 1 0.003 11 1 3  
p2 L 45047 49072 1 4198  
p2 R 54721 58745 1 4198  
p2 M 49073 54720 1 1  
PAIR p3 gyma 1 0.049 21 21 0  
p3 L 147007 148766 704 2443 148814 150350 2651 4198  
p3 R 170220 171076 1 857 171076 171252 954 1131 171530 173066 2651 4198  
p3 M 150358 151155 155 923 165428 169033 5516 9108  
PAIR p4 huck 0 0.042 11 15 1  
p4 L 83174 84848 1 1713  
p4 R 119411 120075 1053 1713  
p4 M 84849 86948 1606 3704 100975 109718 9818 11492 109159 110190 12596 13574  
PAIR p5 huck 0 0.018 11 3 2  
p5 L 86949 88626 1 1713  
p5 R 99238 100973 1 1713  
p5 M 88627 95421 1606 8284 95455 95548 8370 8463 95653 99238 9689 11015  
PAIR p6 ji 1 0.024 11 2 2  
p6 L 62792 64121 1 1306  
p6 R 73176 74505 1 1306  
p6 M 64122 64566 1189 1630 64578 64669 1633 1724 64749 69371 1790 6416 71691  
72946 6449 7712 73018 73176 7747 7905  
PAIR p7 opie 0 0.019 11 10 2  
p7 L 110236 111602 294 1236  
p7 R 118047 119399 294 1236  
p7 M 111603 118047 1230 7670  
PAIR p8 prem1 0 0.013 11 0 2  
p8 L 37647 39539 1381 3252  
p8 R 59660 61607 1327 3252  
p8 M 39557 39651 3268 3362 39676 44658 3365 8316 44665 44773 18 374 44775 44948  
5155 5316  
PAIR p9 prem1 1 0.049 11 11 0  
p9 L 33516 35023 1 1482 35266 35354 484 572 35391 35465 88 162  
p9 R 125324 127310 1 1955  
p9 M 82073 83172 3206 4294 120202 121201 4434 5425 122483 124578 5432 7503  
124609 124870 7601 7860 124914 125221 7895 8199 125221 125314 8203 8296  
PAIR p10 prem2 0 0.040 11 8 1  
p10 L 36407 36829 108 529 61974 62087 1398 1511 62155 62789 1571 2197  
p10 M 62271 62772 1684 2181 62790 62789 6730 7225 74520 75567 2207 3246 75569  
80334 3248 8272 80366 80502 4192 4319 80587 80698 1923 2036 80700 80805 9791  
10257 81726 81864 7854 8039  
p10 R 81866 81968 2196 2291  
FRAG f3 8629 0 10 10 0  
f3 32773 33466 549 1221

FRAG f4 9397 0 5 5 0  
f4 16258 16416 247 413  
FRAG f5 9811 0 8 8 0  
f5 27225 27595 413 776  
FRAG f8 huck 0 3 3 0  
f8 12 3469 8539 11991 4430 11006 9767 12606  
FRAG f11 opie 0 6 6 0  
f11 25416 26645 7578 8794  
FRAG f12 prem2 0 13 13 0  
f12 128105 128224 2828 3374 128246 128369 7988 8110 128371 128484 7854 8161  
128486 128643 7850 8272  
FRAG f15 shadow 0 9 9 0  
f15 27701 32756 6543 11735  
FRAG f16 shadow 0 9 9 0  
f16 129414 130430 1 945 140160 140491 94 421 140593 147005 5203 11621  
FRAG f17 tekay 0 25 25 0  
f17 176104 176230 10768 10906 177304 177599 10753 12133 177601 179224 1692 3230  
179448 180020 95 659 180022 185521 3226 8707  
FRAG f20 bak5 0 7 7 0  
f20 26960 27193 6413 6683  
FRAG f39 rire 0 11 16 1  
f39 121214 122482 6559 7804  
NLTR n1 tourist2 0 4 4 0  
n1 11595 11721 1 128  
NLTR n2 tourist2 0 27 25 1  
n2 179324 179446 1 126
