# Supplementary material
Source: PubMed Central journal article supplement (PMC2230558)
Supplement: plntphys_pp.107.110353_3.pdf [file plntphys_pp.107.110353_3.pdf]

173027  
AP004818.fasta  
PAIR p0 ifisi 1 0.009 30 30 0  
p0 L 119702 120807 1 1170  
p0 R 128509 129615 1 1170  
p0 M 120844 121695 1209 2053 121668 123642 5141 7102 125548 128509 7095 10055  
FRAG f0 hercules 0 12 1 1  
f0 18739 18886 37 178  
FRAG f1 kiseruII 0 6 6 0  
f1 6760 6867 98 199  
FRAG f2 kiseruIV 0 12 10 1  
f2 50417 50542 45 165  
FRAG f3 onagaI 0 10 10 0  
f3 12298 12887 8 653 13922 14099 1134 1302  
FRAG f4 onagaI 0 11 11 0  
f4 14101 14367 1150 1650  
FRAG f5 onagaI 0 12 12 0  
f5 15965 16073 378 478 16084 16223 519 658  
FRAG f33 onagaI 0 12 12 0  
f33 75652 75817 578 748  
FRAG f6 snabo 0 23 23 0  
f6 112717 112822 49 155  
FRAG f7 snabo 0 27 27 0  
f7 115937 116037 3 140  
FRAG f8 tabitoV 0 34 34 0  
f8 142051 142193 85 218  
FRAG f9 tourist 0 12 8 1  
f9 46302 46523 21 248  
FRAG f10 CACTA 0 8 8 0  
f10 7954 8056 774 903  
FRAG f11 CACTA 0 12 11 1  
f11 50963 51104 768 911  
FRAG f12 CACTA 0 12 13 1  
f12 54350 54507 660 835  
FRAG f13 CACTA 0 12 15 1  
f13 57273 57637 604 907  
FRAG f14 CACTA 0 12 16 1  
f14 57646 57786 534 674 57788 57930 663 792  
FRAG f15 CACTA 0 21 21 0  
f15 108927 109141 535 733  
FRAG f16 RIRE3 0 15 15 0  
f16 77898 78048 8526 8663  
FRAG f17 ifisi 0 37 37 0  
f17 143644 143760 7176 7292 146779 146978 10051 10253 146980 148032 200 1245  
FRAG f19 RIRE7 0 31 31 0  
f19 131749 132604 1139 1997  
FRAG f20 T1A-1 0 35 35 0  
f20 142343 142715 379 749  
FRAG f21 Tnr4 0 29 29 0  
f21 119351 119700 30 405  
FRAG f22 oren 0 36 36 0  
f22 143372 143494 10618 10725  
FRAG f23 adh-11 0 12 9 1  
f23 48183 48289 163 274  
FRAG f24 adh-11 0 41 41 0  
f24 168948 169061 13 114  
FRAG f25 adh-5 0 24 24 0

f25 113194 113299 138 228  
FRAG f26 ovikoh 0 12 4 1  
f26 31564 37070 1589 8241  
FRAG f27 adh-typeB 0 0 0 0  
f27 336 467 41 173  
FRAG f28 adh-typeB 0 2 2 0  
f28 4128 4316 16 202  
FRAG f29 adh-typeB 0 7 7 0  
f29 7565 7742 61 221  
FRAG f30 squiq 0 13 13 0  
f30 75870 76178 7400 7682  
FRAG f31 squiq 0 14 14 0  
f31 77573 77695 1604 1730  
FRAG f32 hopi 0 30 17 1  
f32 123643 125547 6876 8782  
NLTR n0 Ac-Ds 0 1 1 0  
n0 3628 3837 1 211  
NLTR n1 hercules 0 5 5 0  
n1 5839 6075 1 239  
NLTR n2 hercules 0 10 0 1  
n2 13287 13536 1 239  
NLTR n3 kiseruII 0 9 9 0  
n3 9166 9331 1 201  
NLTR n4 kiseruIII 0 12 3 1  
n4 30271 30459 1 217  
NLTR n5 shari 0 33 33 0  
n5 140582 140989 4 424  
NLTR n6 snabo 0 28 28 0  
n6 116733 116941 1 213  
NLTR n7 stola 0 40 40 0  
n7 167578 167941 1 362  
NLTR n8 tourist 0 20 20 0  
n8 105349 105653 3 300  
NLTR n9 CACTA 0 12 12 1  
n9 53900 54348 2 1368  
NLTR n10 CACTA 0 12 14 1  
n10 54509 54960 2 1368  
NLTR n11 CACTA 0 18 18 0  
n11 102923 103999 4 1386  
NLTR n12 adh-11 0 12 5 1  
n12 39927 40410 2 431  
NLTR n13 adh-11 0 32 32 0  
n13 132927 133433 2 431  
NLTR n14 adh-11 0 39 39 0  
n14 165360 165854 1 432  
NLTR n15 adh-5 0 22 22 0  
n15 112260 112627 1 372  
NLTR n16 adh-typeA 0 37 19 1  
n16 145585 145828 1 242  
NLTR n17 adh-typeH 0 37 18 1  
n17 145317 145558 1 296  
NLTR n18 adh-typeI 0 19 19 0  
n18 104679 104872 1 196  
NLTR n19 adh-typeM 0 25 25 0  
n19 114184 114398 2 221  
NLTR n20 adh-typeM 0 26 26 0  
n20 114506 114723 1 225
