# Supplementary material
Source: PubMed Central journal article supplement (PMC2230558)
Supplement: plntphys_pp.107.110353_4.pdf [file plntphys_pp.107.110353_4.pdf]

292102  
DQ537335.fasta  
SOLO s0 Romani 0 1 20 1  
s0 256435 258061 412 2034  
SOLO s1 Sabrina 1 0 18 0  
s1 284502 285398 312 1205  
SOLO s2 Angela 1 1 17 1  
s2 277647 279431 1 1784  
SOLO s3 Wilma 1 1 17 1  
s3 83047 84004 1 907 84030 84292 12356 12628  
SOLO s4 Wilma 1 1 17 1  
s4 231014 231966 1 900 231995 232529 12352 12886  
PAIR p1 Angela 1 0.022 1 3 1  
p1 L 21379 23048 2 1654  
p1 R 28445 28800 1 464 41986 42050 493 558 42044 43158 540 1654  
p1 M 23065 28444 1690 7076 28547 28693 7201 7347  
PAIR p2 Daniela 0 0.033 9 3 4  
p2 L 167061 167845 1 785  
p2 R 193376 194161 1 785  
p2 M 167846 167960 1206 1320 184239 193185 1313 10264 193191 193375 10283 10468  
PAIR p3 Erika 1 0.026 1 4 2  
p3 L 28801 30425 1 1601 30422 30903 1835 2315 30903 31320 2797 3214  
p3 R 37719 41724 1 4095 41728 41931 13771 13976  
p3 M 31390 31654 13137 13389 31788 37597 3750 9555  
PAIR p4 Hawi 1 0.028 11 9 2  
p4 L 238202 241198 409 3416  
p4 R 245715 249133 1 3416 249134 249483 11342 11692  
p4 M 241199 245715 3410 7926  
PAIR p5 Sabrina 0 0.025 9 2 5  
p5 L 168246 169164 226 1144 169283 169481 1200 1396  
p5 R 183085 183881 320 1122 184020 184219 1201 1396  
p5 M 179102 179899 2971 3767 180051 180858 3887 4692 181204 181437 4998 5231  
181866 182723 5701 6554  
PAIR p6 Sabrina 1 0.038 9 7 2  
p6 L 147147 147358 48 256 147479 148076 312 903  
p6 R 221416 221953 699 1234  
p6 M 148510 148912 2660 3059 148914 149253 3060 3338 149261 149828 3350 3917  
149853 150211 3939 4287 150238 152208 4293 6265 152210 152763 6258 6787 152885  
153260 6843 7219  
PAIR p7 Sabrina 1 0.025 9 4 4  
p7 L 197998 198197 60 256 198317 199240 312 1234  
p7 R 217783 217982 60 256 218061 219025 270 1234  
p7 M 199498 200142 1486 2127 213212 213484 2130 2401 213792 214163 2691 3059  
214487 215191 3365 4065 215446 217451 4290 6294  
PAIR p8 Wilma 0 0.052 9 12 1  
p8 L 97398 97776 6 384 97816 97930 2 116 97956 98917 106 1012  
p8 R 224899 225013 2 116 225043 226000 110 1012  
p8 M 98918 99249 1433 1779 140076 140284 2084 2313 140839 141012 1713 1945  
141071 145711 4796 9392 146083 146587 9889 10391 146619 147066 10387 10833  
222275 223942 10840 12520 223943 224311 10892 11262 224340 224801 11243 11705  
PAIR p9 WHAM 1 0.037 9 2 3  
p9 L 101904 103040 1 1135  
p9 R 138434 139781 1 1345  
p9 M 104302 108220 4792 8204 132200 132994 8202 9002 133257 135632 2370 4784  
135633 138039 4787 7184 138218 138370 7373 7525  
PAIR p10 WIS 0 0.035 1 0 1  
p10 L 12795 13155 6 362 13432 14868 247 1658

p10 R 20051 20997 1 947 21059 21105 565 612 21267 21378 1194 1315 43218 43578  
8376 8739  
p10 M 14878 16301 1737 3154 16326 16633 3138 3442 16643 16818 3494 3669 16819  
17384 3637 4243 17395 17539 4296 4440 17566 19576 4378 6383 19583 20050 6391  
7081  
PAIR p0 WIS 0 0.025 7 4 1  
p0 L 63006 63915 5 916  
p0 R 69149 70808 5 1657  
p0 M 63916 69140 1856 7078  
FRAG f0 Ames 0 6 6 0  
f0 55635 58708 9016 13059  
FRAG f1 Angela 0 19 19 0  
f1 289154 290016 1261 2144  
FRAG f3 Hawi 0 11 19 1  
f3 255854 256149 778 1116  
FRAG f4 Pong 0 16 16 0  
f4 277031 277586 237 790  
FRAG f5 Jeli 0 11 12 2  
f5 250283 254139 5706 9543  
FRAG f6 Romani 0 21 21 0  
f6 290381 292056 3 1630  
FRAG f10 Enac 0 0 0 0  
f10 11531 11787 5918 6225  
FRAG f11 Fatima 0 11 18 1  
f11 234692 235235 6 561 255230 255845 8582 9206  
FRAG f12 Gujog 0 11 11 2  
f12 249548 249959 1792 2241  
FRAG f13 Oref 0 2 2 0  
f13 43843 44183 1657 1998  
FRAG f19 Hawi 0 9 10 1  
f19 90703 94776 126 3765  
FRAG f20 Bagy 0 9 11 1  
f20 94783 95010 7074 7347  
FRAG f21 Sabrina 0 9 6 1  
f21 84304 85353 6095 7143  
FRAG f23 Egug 0 9 7 1  
f23 87354 87487 2046 2189 87801 88323 2442 3743  
FRAG f24 Derami 0 9 8 1  
f24 88325 89161 2652 3500  
FRAG f25 Derami 0 9 9 1  
f25 89163 90261 2707 3911  
FRAG f26 Sabrina 0 9 14 1  
f26 227117 229181 4998 7118 232531 234185 5400 7138 258062 258627 7133 7698  
FRAG f27 Egug 0 9 15 1  
f27 230320 231008 3923 4629  
FRAG f28 Emil 0 9 13 1  
f28 226104 226215 3090 3196  
FRAG f29 Latidu 0 9 1 3  
f29 99251 101887 1 2636 139880 140074 2768 3754 140286 140835 2768 3754  
98918 99249 1433 1779 140076 140284 2084 2313 140839 141012 1713 1945 141071  
145711 4796 9392  
FRAG f15 Jorge 0 9 1 5  
f15 108222 108988 2 843 130267 132198 13251 14733  
FRAG f7 Gujog 0 9 1 6  
f7 118435 119335 4 898 119337 119845 899 1408 120998 121557 1967 2602  
FRAG f2 Gujog 0 9 2 6  
f2 122046 124225 1407 4233

FRAG f22 Egug 0 9 8 2  
f22 221954 222274 6904 7213  
FRAG f8 Egug 0 9 7 3  
f8 148079 148476 2156 2562  
FRAG f17 Derami 0 9 5 4  
f17 219026 219346 1293 1614  
FRAG f16 Egug 0 9 6 6  
f16 181479 181862 4597 4973  
FRAG f14 Ames 0 9 6 5  
f14 206678 213206 6530 13059  
FRAG f9 Laura 0 9 5 5  
f9 200146 206676 4 6518  
NLTR n0 Revo 0 4 4 0  
n0 47294 47411 8 126  
NLTR n1 Yabi 0 3 3 0  
n1 46234 46492 1 260  
NLTR n2 Boba 0 7 7 0  
n2 59776 62963 1 3189 70813 73066 3154 5408  
NLTR n3 Damocles 0 8 8 0  
n3 74637 74794 1 159  
NLTR n4 Ganesh 0 15 15 0  
n4 265920 266122 1 204  
NLTR n5 Gobefo 0 14 14 0  
n5 261388 263030 1 1661  
NLTR n6 Ijeij 0 5 5 0  
n6 47576 53081 2 5519 53083 54835 5520 7256  
NLTR n7 Jason 0 13 13 0  
n7 259024 259281 1 260  
NLTR n8 Deimos 0 9 0 6  
n8 115439 117620 1 2159  
NLTR n9 Nusif 0 9 13 3  
n9 164141 166653 1 2513 194162 197978 2510 6328 219348 220721 6324 7697  
NLTR n10 Egug 0 9 12 3  
n10 153261 154147 6 867 158374 160160 863 2635 160162 163671 2636 6155 163675  
164139 6376 6818 220727 221404 837 1519  
NLTR n11 Fatima 0 9 5 6  
n11 170007 179083 4 9206
