# Supplementary material
Source: PubMed Central journal article supplement (PMC2230558)

# Huck LTR retrotransposon

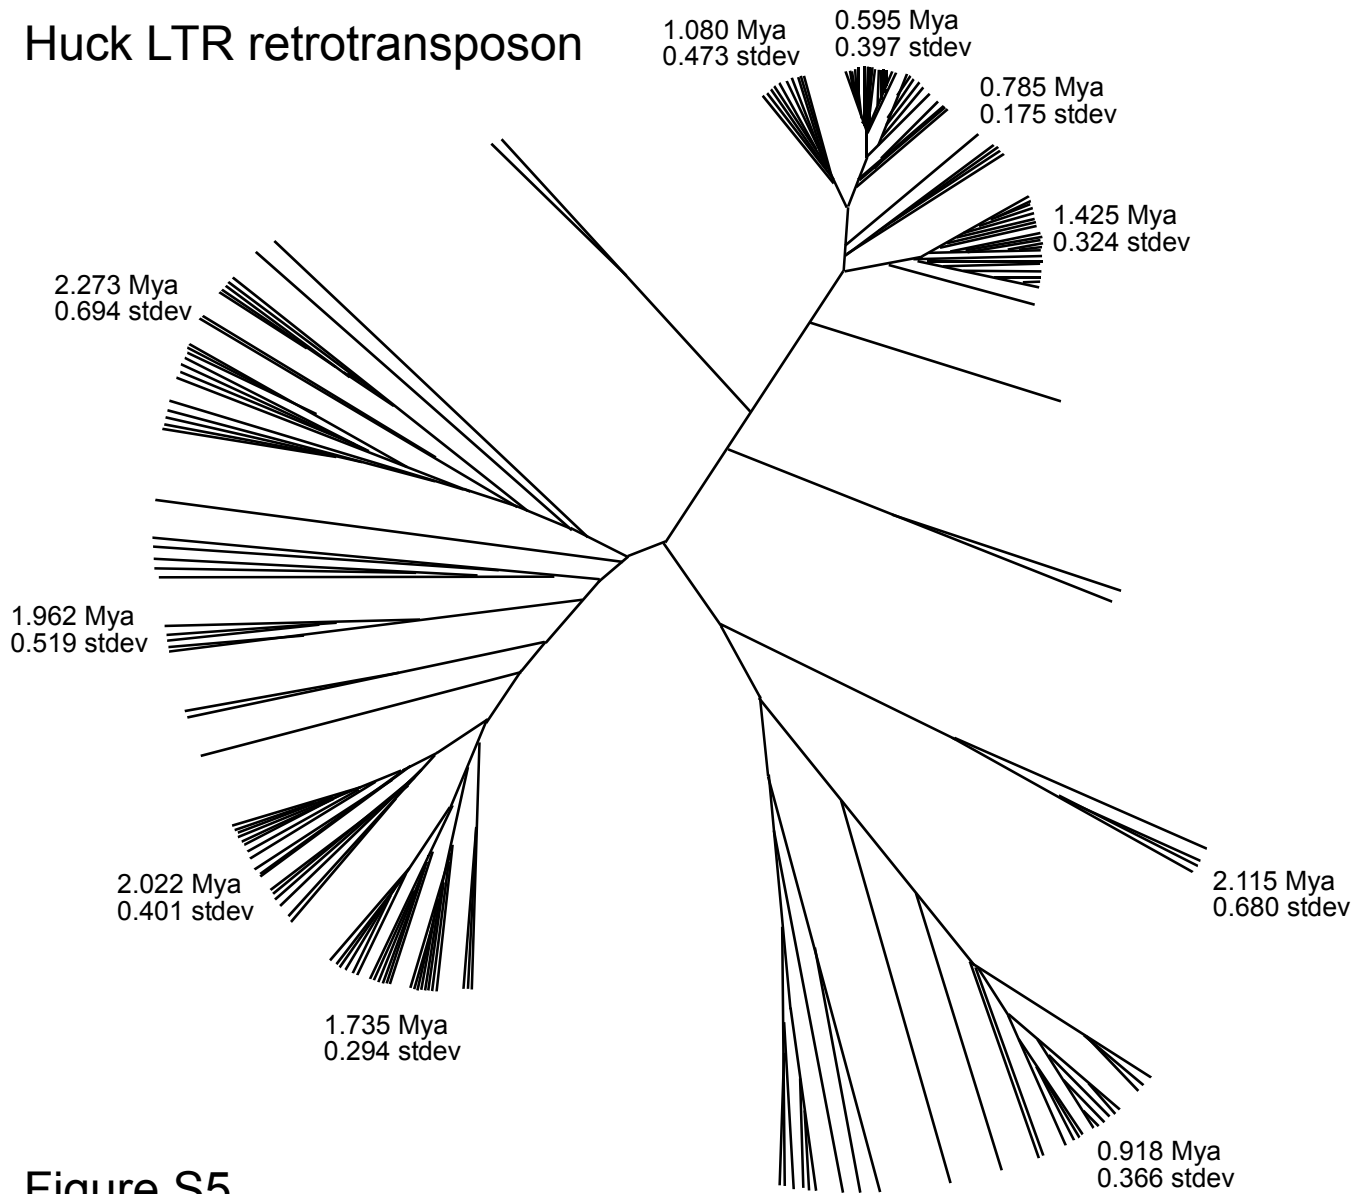

Figure S5

Supplement: plntphys_pp.107.110353_5.pdf [file plntphys_pp.107.110353_5.pdf]

# Opie LTR retrotransposon

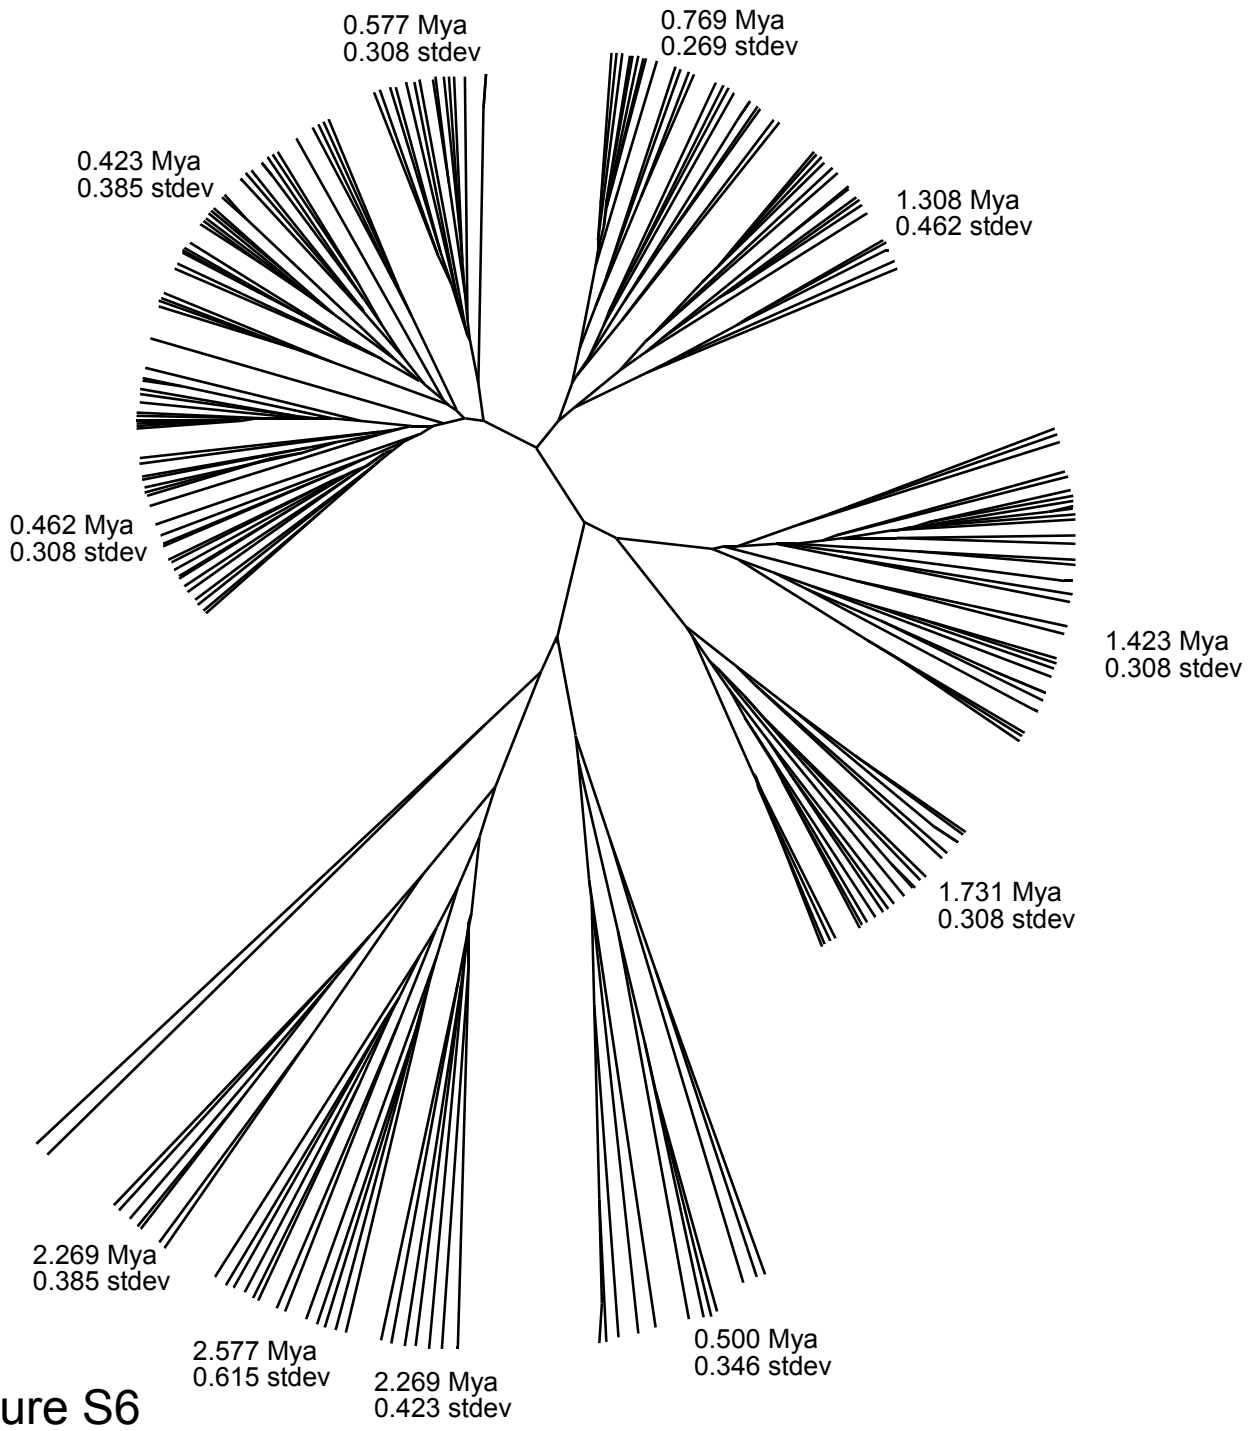

Figure S6

Supplement: plntphys_pp.107.110353_6.pdf [file plntphys_pp.107.110353_6.pdf]
